# Supplementary material for: Hyper-Reflecting Foci in Multiple Sclerosis Retina Associate With Macrophage/Microglia-Derived Cytokines in Cerebrospinal Fluid
Source: PubMed Central journal article supplement (PMC9160385; doi:10.3389/fimmu.2022.852183), 2022-05-19
Supplement: Table_1.pdf [file Table_1.pdf]

|                                | r-value        | p-value          |
|--------------------------------|----------------|------------------|
| <b>IL1-Ra cont</b>             | <b>-0.6714</b> | <b>0.0016</b> ** |
| <b>IL-9</b>                    | <b>-0.6091</b> | <b>0.0056</b> ** |
| <b>IL-15</b>                   | <b>-0.6263</b> | <b>0.0041</b> ** |
| Eotaxin                        | 0.1207         | 0.6226 ns        |
| <b>G-CSF</b>                   | <b>-0.5099</b> | <b>0.0257</b> *  |
| <b>IFN-<math>\gamma</math></b> | <b>-0.4894</b> | <b>0.0334</b> *  |
| MIP-1a                         | 0.09123        | 0.7103 ns        |
| MIP-1b                         | -0.3119        | 0.1936 ns        |
| PDGF-BB                        | -0.2789        | 0.2476 ns        |
| RANTES                         | -0.1231        | 0.6155 ns        |
| VEGF                           | -0.326         | 0.1732 ns        |
| APRIL                          | -0.03009       | 0.9027 ns        |
| BAFF                           | -0.1463        | 0.5502 ns        |
| sCD30                          | -0.02115       | 0.9315 ns        |
| sCD163                         | -0.04493       | 0.8551 ns        |
| sIL-6Rb                        | -0.02555       | 0.9173 ns        |
| IFN- $\beta$                   | 0.1692         | 0.4887 ns        |
| sIL-6Ra                        | -0.03172       | 0.8974 ns        |
| IL-10                          | 0.08634        | 0.7252 ns        |
| IL-11                          | 0.1412         | 0.5643 ns        |
| IL-19                          | 0.1276         | 0.6027 ns        |
| IL-20                          | 0.1932         | 0.4281 ns        |
| IL-22                          | -0.001767      | 0.9943 ns        |

|               | r-value  | p-value   |
|---------------|----------|-----------|
| IL-26         | 0.1921   | 0.4308 ns |
| IL-27         | 0.2963   | 0.218 ns  |
| IL-32         | -0.2512  | 0.2995 ns |
| IL-34         | -0.2226  | 0.3596 ns |
| IL-35         | 0.1043   | 0.6709 ns |
| LIGHT TNFSF14 | -0.1709  | 0.4841 ns |
| Osteocalcina  | -0.1383  | 0.5722 ns |
| Osteopontina  | -0.2969  | 0.217 ns  |
| Pentraxin-3   | -0.1315  | 0.5917 ns |
| sTNF-R1       | -0.1639  | 0.5026 ns |
| sTNF-R2       | 0.07577  | 0.7579 ns |
| TSLP          | 0.008853 | 0.9713 ns |
| TNFSF12       | -0.3119  | 0.1936 ns |
| CCL-21        | -0.3656  | 0.1237 ns |
| CXCL-13       | 0.3841   | 0.1044 ns |
| CCL-27        | 0.1841   | 0.4505 ns |
| CXCL-25       | 0.0736   | 0.7646 ns |
| CCL-24        | -0.1216  | 0.62 ns   |
| CCL-26        | -0.06217 | 0.8004 ns |
| CX3CL-1       | -0.2123  | 0.3828 ns |
| CXCL-6        | -0.1151  | 0.6388 ns |
| GM-CSF        | -0.2217  | 0.3617 ns |
| CXCL-1        | -0.1076  | 0.6611 ns |

|               | r-value    | p-value   |
|---------------|------------|-----------|
| CXCL-2        | -0.2865    | 0.2343 ns |
| CCL-1         | -0.0511    | 0.8354 ns |
| IL-2          | 0.07607    | 0.7569 ns |
| IL-4          | 0.1154     | 0.638 ns  |
| IL-6          | -0.1172    | 0.6327 ns |
| IL-8          | -0.03789   | 0.8776 ns |
| IL-16         | -0.07753   | 0.7524 ns |
| CXCL-10       | 0.2626     | 0.2775 ns |
| CXCL-11       | 0.3295     | 0.1683 ns |
| CCL-2         | -0.2423    | 0.3176 ns |
| CCL-8         | -0.0004407 | 0.9986 ns |
| CCL-7         | -0.07804   | 0.7508 ns |
| CCL-13        | -0.05685   | 0.8172 ns |
| CCL-22        | 0.2626     | 0.2775 ns |
| MIF           | -0.1225    | 0.6174 ns |
| CXCL-9        | 0.3101     | 0.1963 ns |
| CCL-15        | -0.3004    | 0.2114 ns |
| CCL-19        | -0.2211    | 0.3629 ns |
| CCL-23        | -0.06079   | 0.8047 ns |
| CXCL-16       | -0.06784   | 0.7826 ns |
| CXCL-12       | -0.05727   | 0.8159 ns |
| CCL-25        | 0.0008811  | 0.9971 ns |
| TNF- $\alpha$ | 0.2186     | 0.3686 ns |
