# Supplementary material for: Hyper-Reflecting Foci in Multiple Sclerosis Retina Associate With Macrophage/Microglia-Derived Cytokines in Cerebrospinal Fluid
Source: PubMed Central journal article supplement (PMC9160385; doi:10.3389/fimmu.2022.852183), 2022-05-19
Supplement: Table_2.pdf [file Table_2.pdf]

|               | r-value        | p-value                    |
|---------------|----------------|----------------------------|
| IL1-Ra cont   | -0.183         | 0.4533 <sup>ns</sup>       |
| IL-9          | -0.1813        | 0.4575 <sup>ns</sup>       |
| IL-15         | -0.1206        | 0.6229 <sup>ns</sup>       |
| Eotaxin       | 0.09767        | 0.6908 <sup>ns</sup>       |
| G-CSF         | -0.07967       | 0.7458 <sup>ns</sup>       |
| IFN- $\gamma$ | -0.159         | 0.5157 <sup>ns</sup>       |
| MIP-1a        | 0.3917         | 0.0972 <sup>ns</sup>       |
| MIP-1b        | -0.0396        | 0.8721 <sup>ns</sup>       |
| PDGF-BB       | -0.08918       | 0.7166 <sup>ns</sup>       |
| RANTES        | -0.009696      | 0.9686 <sup>ns</sup>       |
| VEGF          | 0.1126         | 0.6462 <sup>ns</sup>       |
| APRIL         | -0.1498        | 0.5405 <sup>ns</sup>       |
| BAFF          | -0.1918        | 0.4315 <sup>ns</sup>       |
| sCD30         | 0.03608        | 0.8834 <sup>ns</sup>       |
| sCD163        | 0.1443         | 0.5556 <sup>ns</sup>       |
| sIL-6Rb       | 0.2552         | 0.2917 <sup>ns</sup>       |
| IFN- $\beta$  | -0.3423        | 0.1514 <sup>ns</sup>       |
| sIL-6Ra       | 0.337          | 0.1583 <sup>ns</sup>       |
| IL-10         | -0.1021        | 0.6776 <sup>ns</sup>       |
| IL-11         | 0.08987        | 0.7145 <sup>ns</sup>       |
| IL-19         | -0.2734        | 0.2575 <sup>ns</sup>       |
| IL-20         | -0.1784        | 0.4649 <sup>ns</sup>       |
| <b>IL-22</b>  | <b>-0.4693</b> | <b>0.0426</b> <sup>*</sup> |

|                | r-value        | p-value                    |
|----------------|----------------|----------------------------|
| IL-26          | -0.3291        | 0.1689 <sup>ns</sup>       |
| IL-27          | -0.02818       | 0.9088 <sup>ns</sup>       |
| IL-32          | -0.06173       | 0.8018 <sup>ns</sup>       |
| <b>IL-34</b>   | <b>-0.5073</b> | <b>0.0266</b> <sup>*</sup> |
| <b>IL-35</b>   | <b>-0.4672</b> | <b>0.0437</b> <sup>*</sup> |
| LIGHT TNFSF14  | 0.3819         | 0.1067 <sup>ns</sup>       |
| Osteocalcina   | -0.03696       | 0.8806 <sup>ns</sup>       |
| Osteopontina   | 0.04487        | 0.8553 <sup>ns</sup>       |
| Pentraxin-3    | -0.02863       | 0.9074 <sup>ns</sup>       |
| sTNF-R1        | 0.0176         | 0.943 <sup>ns</sup>        |
| sTNF-R2        | 0.2235         | 0.3577 <sup>ns</sup>       |
| TSLP           | -0.03227       | 0.8957 <sup>ns</sup>       |
| TNFSF12        | 0.08975        | 0.7148 <sup>ns</sup>       |
| CCL-21         | 0.05983        | 0.8078 <sup>ns</sup>       |
| <b>CXCL-13</b> | <b>0.498</b>   | <b>0.03</b> <sup>*</sup>   |
| CCL-27         | -0.1117        | 0.6488 <sup>ns</sup>       |
| CXCL-25        | -0.1461        | 0.5506 <sup>ns</sup>       |
| CCL-24         | 0.01848        | 0.9402 <sup>ns</sup>       |
| CCL-26         | -0.2642        | 0.2744 <sup>ns</sup>       |
| CX3CL-1        | 0.09503        | 0.6988 <sup>ns</sup>       |
| CXCL-6         | -0.1683        | 0.491 <sup>ns</sup>        |
| GM-CSF         | 0.132          | 0.59 <sup>ns</sup>         |
| CXCL-1         | 0.03831        | 0.8763 <sup>ns</sup>       |

|                | r-value        | p-value                    |
|----------------|----------------|----------------------------|
| <b>CXCL-2</b>  | <b>-0.5287</b> | <b>0.02</b> <sup>*</sup>   |
| CCL-1          | -0.1214        | 0.6205 <sup>ns</sup>       |
| IL-2           | -0.2741        | 0.2561 <sup>ns</sup>       |
| IL-4           | -0.1452        | 0.5532 <sup>ns</sup>       |
| IL-6           | 0.07042        | 0.7745 <sup>ns</sup>       |
| IL-8           | 0.2824         | 0.2413 <sup>ns</sup>       |
| IL-16          | -0.1645        | 0.5009 <sup>ns</sup>       |
| <b>CXCL-10</b> | <b>0.4716</b>  | <b>0.0415</b> <sup>*</sup> |
| CXCL-11        | 0.4355         | 0.0623 <sup>ns</sup>       |
| CCL-2          | 0.00264        | 0.9914 <sup>ns</sup>       |
| CCL-8          | 0.4115         | 0.08 <sup>ns</sup>         |
| CCL-7          | -0.2607        | 0.2811 <sup>ns</sup>       |
| CCL-13         | 0.03081        | 0.9004 <sup>ns</sup>       |
| CCL-22         | 0.4479         | 0.0545 <sup>ns</sup>       |
| MIF            | 0.09415        | 0.7014 <sup>ns</sup>       |
| CXCL-9         | 0.2173         | 0.3714 <sup>ns</sup>       |
| CCL-15         | 0.01232        | 0.9601 <sup>ns</sup>       |
| CCL-19         | 0.1681         | 0.4916 <sup>ns</sup>       |
| CCL-23         | -0.06687       | 0.7856 <sup>ns</sup>       |
| CXCL-16        | 0.09415        | 0.7014 <sup>ns</sup>       |
| CXCL-12        | 0.2657         | 0.2715 <sup>ns</sup>       |
| CCL-25         | -0.2349        | 0.333 <sup>ns</sup>        |
| TNF- $\alpha$  | -0.02245       | 0.9273 <sup>ns</sup>       |
